# Supplementary material
Source: PubMed Central journal article supplement (PMC5753305)
Supplement: CJN.03570417SupplementaryData.pdf [file CJN.03570417SupplementaryData.pdf]

*Supplemental material is neither peer-reviewed nor thoroughly edited by CJASN. The authors alone are responsible for the accuracy and presentation of the material.*

## **Supplemental Appendix**

### **List of investigators**

BELGIUM: Rita Lombaerts, Maria Van Dyck, Khalid Ismaili;

FRANCE: Michel Foulard, Annie Lahoche, Tim Ulinski, Georges Deschenes, Michel Fischbach, Anne Laure Adra Delenne, Denis Morin, Michel Tsimaratos;

GERMANY: Franz Schaefer, Bernd Hoppe, Martin Konrad, Markus J. Kemper, Henry Fehrenbach;

HUNGARY: György Reusz;

ITALY: Isabella Guzzo;

POLAND: Sylwester Prokurat, Danuta Zwolinska, Dariusz Runowski, Aleksandra Zurowska, Roman Stankiewicz;

ROMANIA: Ovidiu Limoncu;

SPAIN: Gema Ariceta Iraola, José Nieto Rey, Rafael Bedoya Perez, Angel Alonso Melgar;

THAILAND: Anirut Pattaragarn, Pornchai Kingwatanakul;

UKRAINE: Stella Kushnirenko, Svitlana Nedelska
